# Supplementary material
Source: Springer Nature journal article supplement (https://www.springermedizin.de/resource/supplementary/12889_2010_2685_MOESM1_ESM.pdf/9487078)

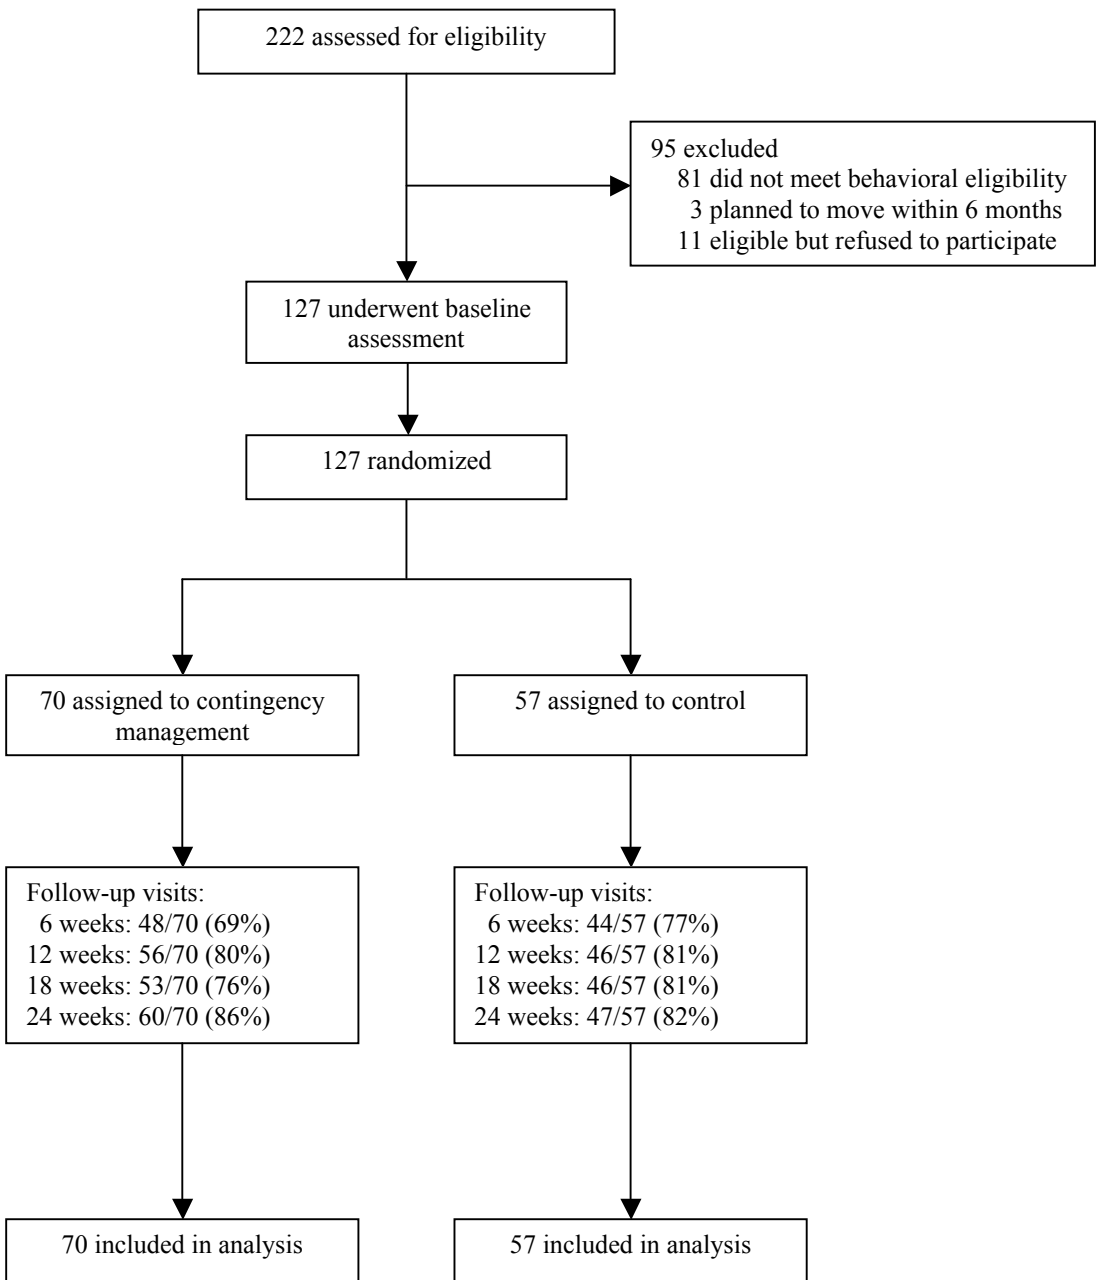

Supplement: MOESM1 [file 9487078]
